# Supplementary material for: Corticosterone implants make stress hyporesponsive birds
Source: Oxford University Press journal article supplement (doi:10.1242/jeb.173864), 2018-01-01
Supplement: jeb173864supp.pdf [file jeb173864supp.pdf]

## SUPPLEMENTARY MATERIAL

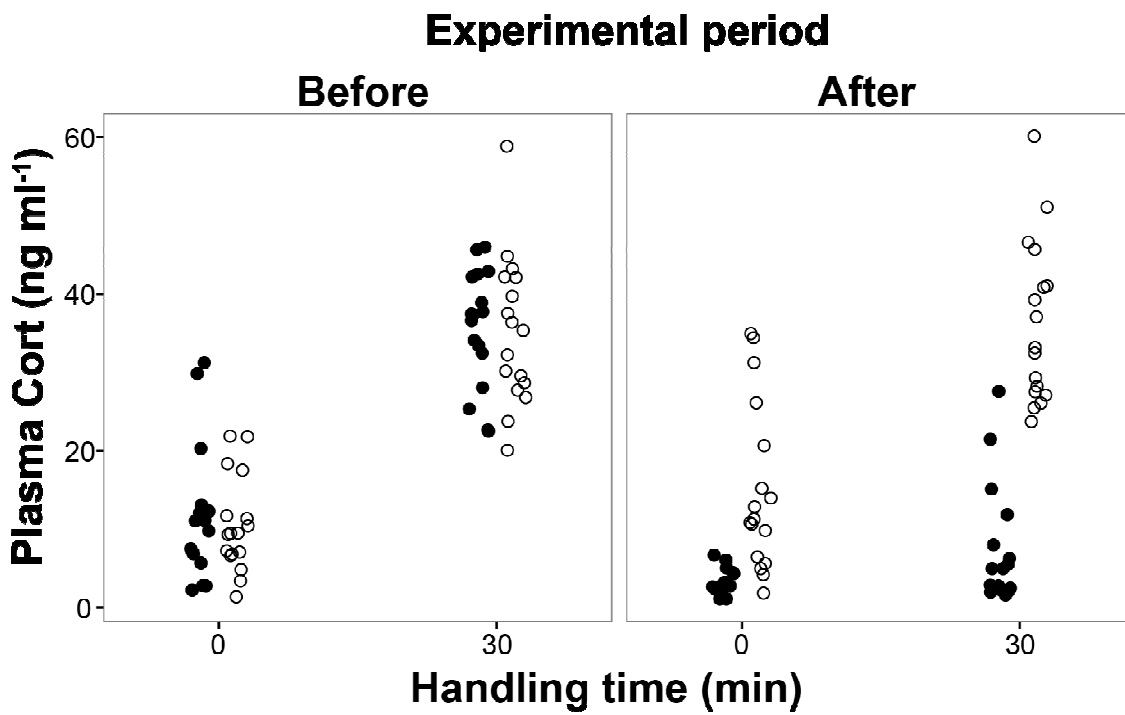

**Figure S1. Effects of Cort implants on white storks' plasma Cort levels (Experiment 1).** Baseline and stress-induced plasma Cort levels (handling time: 0 vs. 30 min post-capture) in free-living white stork nestlings from Experiment 1, both before (day 0) and after (day 7) the manipulation with time-release implants (TRP). Solid circles show Cort-implanted birds (N=17) and open circles sham-implanted individuals (N=17).

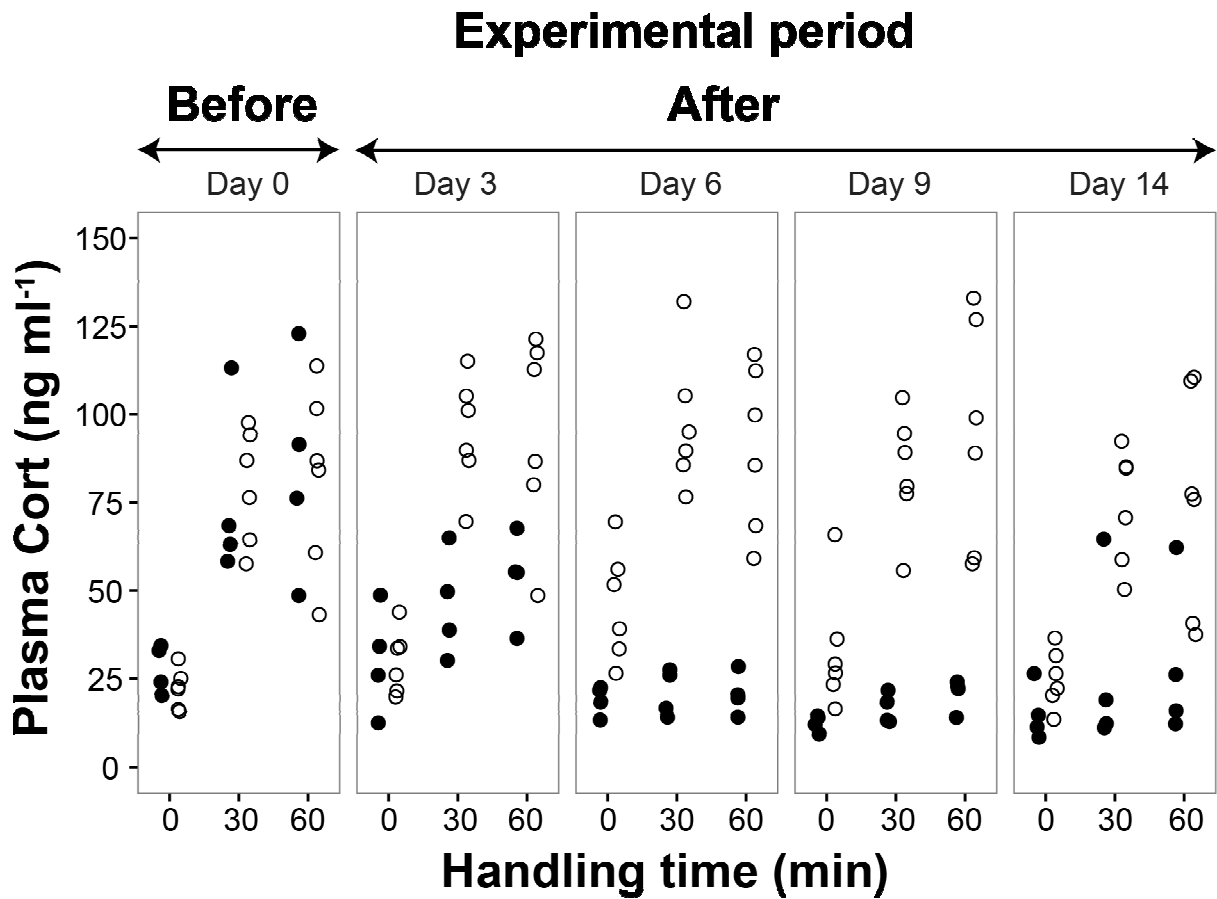

**Figure S2. Effects of Cort implants on white storks' plasma Cort levels (Experiment 2).** Baseline and stress-induced plasma Cort levels (handling time: 0-30-60 min post-capture) in captive white stork adults from Experiment 2, both before (day 0) and after (days 3, 6, 9 and 14) the manipulation with time-release implants (TRP). Solid circles show Cort-implanted birds (N=4) and open circles sham-implanted individuals (N=6).

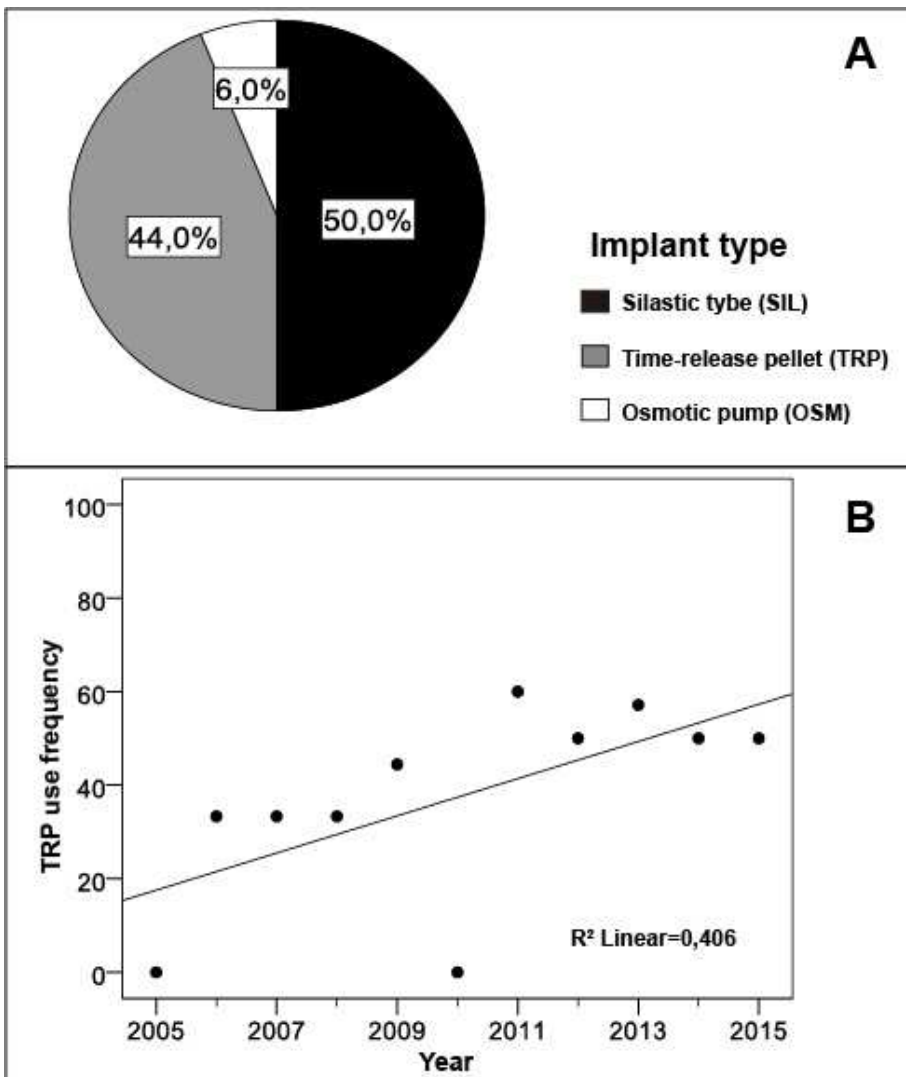

**Figure S3. Researcher' patterns in the use of Cort implants.** Researchers patterns for the use of different types of Cort implant methods in birds (A), and temporal change (B) in the use of time-release Cort implants (TRP) relative to other methods during 2005-2015 (N= 50 studies).

**Table S1. Summary of published reports on the effects of Cort implants on circulating baseline and stress-induced Cort levels in birds (experiments sorted by type of implant and publication year).**

[Click here to Download Table S1](#)

**Table S2. Results from the multiple comparisons of means (Tukey contrasts) allowing the analysis of the significant 3-way interaction "Experimental Period X Handling time X Treatment" from Experiment 1.** Reported P-values are adjusted following Bonferroni method (P-value codes: "\*" < 0.05; "\*\*\*" < 0.01; "\*\*\*\*" < 0.001).

| Group 1             |               |           | Group 2             |               |           | Tukey contrast |            |         |       |
|---------------------|---------------|-----------|---------------------|---------------|-----------|----------------|------------|---------|-------|
| Experimental period | Handling time | Treatment | Experimental period | Handling time | Treatment | Estimate       | Std. Error | z value | P     |
| After               | 0             | CORT      | Before              | 0             | CORT      | -8.09          | 2.51       | -3.219  | *     |
| Before              | 30            | CORT      | Before              | 0             | CORT      | 24.37          | 2.51       | 9.698   | ***   |
| After               | 30            | CORT      | Before              | 0             | CORT      | -3.95          | 2.51       | -1.572  | ≥0.05 |
| Before              | 0             | Sham      | Before              | 0             | CORT      | -0.74          | 2.80       | -0.266  | ≥0.05 |
| After               | 0             | Sham      | Before              | 0             | CORT      | 3.75           | 2.80       | 1.337   | ≥0.05 |
| Before              | 30            | Sham      | Before              | 0             | CORT      | 23.98          | 2.80       | 8.541   | ***   |
| After               | 30            | Sham      | Before              | 0             | CORT      | 24.89          | 2.80       | 8.866   | ***   |
| Before              | 30            | CORT      | After               | 0             | CORT      | 32.46          | 2.51       | 12.917  | ***   |
| After               | 30            | CORT      | After               | 0             | CORT      | 4.14           | 2.51       | 1.647   | ≥0.05 |
| Before              | 0             | Sham      | After               | 0             | CORT      | 7.34           | 2.80       | 2.615   | ≥0.05 |
| After               | 0             | Sham      | After               | 0             | CORT      | 11.84          | 2.80       | 4.218   | ***   |
| Before              | 30            | Sham      | After               | 0             | CORT      | 32.07          | 2.80       | 11.422  | ***   |
| After               | 30            | Sham      | After               | 0             | CORT      | 32.98          | 2.80       | 11.747  | ***   |
| After               | 30            | CORT      | Before              | 30            | CORT      | -28.32         | 2.51       | -11.270 | ***   |
| Before              | 0             | Sham      | Before              | 30            | CORT      | -25.12         | 2.80       | -8.946  | ***   |
| After               | 0             | Sham      | Before              | 30            | CORT      | -20.62         | 2.80       | -7.343  | ***   |
| Before              | 30            | Sham      | Before              | 30            | CORT      | -0.39          | 2.80       | -0.139  | ≥0.05 |
| After               | 30            | Sham      | Before              | 30            | CORT      | 0.52           | 2.80       | 0.186   | ≥0.05 |
| Before              | 0             | Sham      | After               | 30            | CORT      | 3.20           | 2.80       | 1.140   | ≥0.05 |
| After               | 0             | Sham      | After               | 30            | CORT      | 7.70           | 2.80       | 2.744   | ≥0.05 |
| Before              | 30            | Sham      | After               | 30            | CORT      | 27.93          | 2.80       | 9.947   | ***   |
| After               | 30            | Sham      | After               | 30            | CORT      | 28.84          | 2.80       | 10.273  | ***   |
| After               | 0             | Sham      | Before              | 0             | Sham      | 4.50           | 2.51       | 1.791   | ≥0.05 |
| Before              | 30            | Sham      | Before              | 0             | Sham      | 24.73          | 2.51       | 9.840   | ***   |
| After               | 30            | Sham      | Before              | 0             | Sham      | 25.64          | 2.51       | 10.204  | ***   |
| Before              | 30            | Sham      | After               | 0             | Sham      | 20.22          | 2.51       | 8.049   | ***   |
| After               | 30            | Sham      | After               | 0             | Sham      | 21.14          | 2.51       | 8.413   | ***   |
| After               | 30            | Sham      | Before              | 30            | Sham      | 0.91           | 2.51       | 0.364   | ≥0.05 |

**Table S3. Results from the multiple comparisons of means (Tukey contrasts) allowing the analysis of the significant 3-way interaction "Experimental Period X Handling time X Treatment" from Experiment 2.** Reported P-values are adjusted following Bonferroni method (P-value codes: "\*" < 0.05; "\*\*\*" < 0.01; "\*\*\*\*" < 0.001).

[Click here to Download Table S3](#)

## SUPPLEMENTARY REFERENCES

- Aharon-Rotman, Y., Buchanan, K. L., Klaassen, M. and Buttemer, W. A.** in press. An experimental examination of interindividual variation in feather corticosterone content in the house sparrow, *Passer domesticus* in southeast Australia. *Gen. Comp. Endocrinol.*
- Almasi, B., Roulin, A., Jenni-Eiermann, S., Breuner, C. W. and Jenni, L.** (2009). Regulation of free corticosterone and CBG capacity under different environmental conditions in altricial nestlings. *Gen. Comp. Endocrinol.* **164**, 117–124.
- Almasi, B., Rettenbacher, S., Müller, C., Brill, S., Wagner, H. and Jenni, L.** (2012). Maternal corticosterone is transferred into the egg yolk. *Gen. Comp. Endocrinol.* **178**, 139–144.
- Almasi, B., Roulin, A. and Jenni, L.** (2013). Corticosterone shifts reproductive behaviour towards self-maintenance in the barn owl and is linked to melanin-based coloration in females. *Horm. Behav.* **64**, 161–171.
- Angelier, F., Clément-Chastel, C., Welcker, J., Gabrielsen, G. W. and Chastel, O.** (2009). How does corticosterone affect parental behaviour and reproductive success? A study of prolactin in black-legged kittiwakes. *Funct. Ecol.* **23**, 784–793.
- Bonier, F., Martin, P. R. and Wingfield, J. C.** (2007). Maternal corticosteroids influence primary offspring sex ratio in a free-ranging passerine bird. *Behav. Ecol.* **18**, 1045–1050.
- Bourgeon, S. and Raclot, T.** (2006). Corticosterone selectively decreases humoral immunity in female eiders during incubation. *J. Exp. Biol.* **209**, 4957–4965.
- Bouton, S. N.** (2005). Effects of multiple stressors on the physiology, development and survival of nestling cliff swallows. *PhD thesis*, University of Michigan, MI.
- Butler, M. W., Leppert, L. L. and Dufty, A. M.** (2010). Effects of small increases in corticosterone levels on morphology, immune function, and feather development. *Physiol. Biochem. Zool.* **83**, 78–86.
- Cottin, M., Kato, A., Thierry, A.-M., Maho, Y. Le, Raclot, T. and Ropert-Coudert, Y.** (2011). Does corticosterone affect diving behaviour of male adélie penguins? A preliminary experimental study. *Ornithol. Sci.* **10**, 3–11.
- Cottin, M., MacIntosh, A. J. J., Kato, A., Takahashi, A., Debin, M., Raclot, T. and Ropert-Coudert, Y.** (2014). Corticosterone administration leads to a transient alteration of foraging behaviour and

complexity in a diving seabird. *Mar. Ecol. Prog. Ser.* **496**, 249–262.

**Criscuolo, F., Chastel, O., Bertile, F., Gabrielsen, G. W., Le, Y. and Y, L. M.** (2005). Corticosterone alone does not trigger a short term behavioural shift in female common eiders *Somateria mollissima* but does incubating success modify long term reproductive. *J. Avian Biol.* **36**, 306–312.

**Crossin, G. T., Trathan, P. N., Phillips, R. A., Gorman, K. B., Dawson, A., Sakamoto, K. Q. and Williams, T. D.** (2012). Corticosterone predicts foraging behavior and parental care in macaroni penguins. *Am. Nat.* **180**, E31–E41.

**Davies, S., Rodriguez, N. S., Sweazea, K. L. and Deviche, P.** (2013). The effect of acute stress and long-term corticosteroid administration on plasma metabolites in an urban and desert songbird. *Physiol. Biochem. Zool.* **86**, 47–60.

**Davis, K. A., Schmidt, J. B., Doescher, R. M. and Satterlee, D. G.** (2008). Fear responses of offspring from divergent quail stress response line hens treated with corticosterone during egg formation. *Poult. Sci.* **87**, 1303–1313.

**DesRochers, D. W., Reed, J. M., Awerman, J., Kluge, J. A., Wilkinson, J., van Griethuijsen, L. I., Aman, J. and Romero, L. M.** (2009). Exogenous and endogenous corticosterone alter feather quality. *Comp. Biochem. Physiol. - A Mol. Integr. Physiol.* **152**, 46–52.

**Fairhurst, G. D., Marchant, T. A., Soos, C., Machin, K. L. and Clark, R. G.** (2013). Experimental relationships between levels of corticosterone in plasma and feathers in a free-living bird. *J. Exp. Biol.* **216**, 4071–4081.

**Goerlich, V. C.** (2009). Manipulative mothers. Maternal steroid hormones and avian offspring sex ratio. Studies in the Homing pigeon. *PhD thesis*, University of Groningen, The Netherlands.

**Goutte, A., Clément-Chastel, C., Moe, B., Bech, C., Gabrielsen, G. W. and Chastel, O.** (2011). Experimentally reduced corticosterone release promotes early breeding in black-legged kittiwakes. *J. Exp. Biol.* **214**, 2005–2013.

**Hennin, H. L.** (2016). Energetic physiology mediates reproductive decisions in a long-lived, capital-income breeding seaduck. *PhD thesis*, University of Windsor, ON.

**Hennin, H. L., Wells-Berlin, A. M. and Love, O. P.** (2016). Baseline glucocorticoids are drivers of body mass gain in a diving seabird. *Ecol. Evol.* **6**, 1702–1711.



- Henriksen, R., Groothuis, T. G. and Rettenbacher, S.** (2011). Elevated plasma corticosterone decreases yolk testosterone and progesterone in chickens: linking maternal stress and hormone-mediated maternal effects. *PLoS One* **6**, e23824.
- Horton, B. M. and Holberton, R. L.** (2009). Corticosterone manipulations alter morph-specific nestling provisioning behavior in male white-throated sparrows, *Zonotrichia albicollis*. *Horm. Behav.* **56**, 510–518.
- Horton, B. M., Long, J. A. and Holberton, R. L.** (2007). Intraperitoneal delivery of exogenous corticosterone via osmotic pump in a passerine bird. *Gen. Comp. Endocrinol.* **152**, 8–13.
- Jenni-Eiermann, S., Helfenstein, F., Vallat, A., Glauser, G. and Jenni, L.** (2015). Corticosterone: effects on feather quality and deposition into feathers. *Methods Ecol. Evol.* **6**, 237–246.
- Laplante, K. A.** (2013). Stress and social relationships: the role of corticosterone in the formation and maintenance of pair bonds in the monogamous zebra finch (*Taeniopygia guttata*). *PhD thesis*, University of Wayne State, Detroit, MI.
- Larose, K. and Dubois, F.** (2011). Constraints on the evolution of reciprocity: an experimental test with zebra finches. *Ethology* **117**, 115–123.
- Love, O. P., Chin, E. H., Wynne-Edwards, K. E. and Williams, T. D.** (2005). Stress hormones: a link between maternal condition and sex-biased reproductive investment. *Am. Nat.* **166**, 751–766.
- Martin II, L. B., Gilliam, J., Han, P., Lee, K. and Wikelski, M.** (2005). Corticosterone suppresses cutaneous immune function in temperate but not tropical House Sparrows, *Passer domesticus*. *Gen. Comp. Endocrinol.* **140**, 126–135.
- Müller, C., Almasi, B., Roulin, A., Breuner, C. W., Jenni-Eiermann, S. and Jenni, L.** (2009). Effects of corticosterone pellets on baseline and stress-induced corticosterone and corticosteroid-binding-globulin. *Gen. Comp. Endocrinol.* **160**, 59–66.
- Nelson, B. F., Daunt, F., Monaghan, P., Wanless, S., Butler, A., Heidinger, B. J., Newell, M. and Dawson, A.** (2015). Protracted treatment with corticosterone reduces breeding success in a long-lived bird. *Gen. Comp. Endocrinol.* **210**, 38–45.
- Newman, A. E. M., MacDougall-Shackleton, S. A., An, Y. S., Kriengwatana, B. and Soma, K. K.** (2010). Corticosterone and dehydroepiandrosterone have opposing effects on adult neuroplasticity in the avian song control system. *J. Comp. Neurol.* **518**, 3662–3678.

- Ouyang, J. Q., Muturi, M., Quetting, M. and Hau, M.** (2013). Small increases in corticosterone before the breeding season increase parental investment but not fitness in a wild passerine bird. *Horm. Behav.* **63**, 776–781.
- Ouyang, J. Q., Lendvai, Á., Dakin, R., Domalik, A. D., Fasanello, V. J., Vassallo, B. G., Haussmann, M. F., Moore, I. T. and Bonier, F.** (2015). Weathering the storm: parental effort and experimental manipulation of stress hormones predict brood survival. *BMC Evol. Biol.* **15**, 219.
- Owen, J. C., Nakamura, A., Coon, C. A. and Martin, L. B.** (2012). The effect of exogenous corticosterone on West Nile virus infection in Northern Cardinals (*Cardinalis cardinalis*). *Vet. Res.* **43**, 34.
- Pike, T. W. and Petrie, M.** (2006). Experimental evidence that corticosterone affects offspring sex ratios in quail. *Proc. R. Soc. B-Biological Sci.* **273**, 1093–1098.
- Pravosudov, V. V.** (2003). Long-term moderate elevation of corticosterone facilitates avian food-caching behaviour and enhances spatial memory. *Proc. R. Soc. B* **270**, 2599–2604.
- Romero, L. M., Strohlic, D. and Wingfield, J. C.** (2005). Corticosterone inhibits feather growth: Potential mechanism explaining seasonal down regulation of corticosterone during molt. *Comp. Biochem. Physiol. - Part A* **142**, 65–73.
- Roulin, A., Almasi, B., Rossi-Pedruzzi, A., Ducrest, A. L., Wakamatsu, K., Miksik, I., Blount, J. D., Jenni-Eiermann, S. and Jenni, L.** (2008). Corticosterone mediates the condition-dependent component of melanin-based coloration. *Anim. Behav.* **75**, 1351–1358.
- Ruppli, C. A., Almasi, B., Dreiss, A. N., Battesti, M., Jenni, L. and Roulin, A.** (2012). Corticosterone promotes scramble competition over sibling negotiation in barn owl nestlings (*Tyto alba*). *Evol. Biol.* **39**, 348–358.
- Satterlee, D. G., Cole, C. A. and Castille, S. A.** (2007). Maternal corticosterone further reduces the reproductive function of male offspring hatched from eggs laid by quail hens selected for exaggerated adrenocortical stress responsiveness. *Poult. Sci.* **86**, 572–581.
- Satterlee, D. G., Hester, a, Leray, K. and Schmidt, J. B.** (2008). Influences of maternal corticosterone and selection for contrasting adrenocortical responsiveness in Japanese quail on developmental instability of female progeny. *Poult. Sci.* **87**, 1504–1509.
- Schmidt, J. B., Andree', R. M., Davis, K. A., Treese, S. M. and Satterlee, D. G.** (2009a). Influence of maternal corticosterone treatment on incubation length of eggs laid by Japanese quail hens

selected for divergent adrenocortical stress responsiveness. *Br. Poult. Sci.* **50**, 739–747.

**Schmidt, J. B., Satterlee, D. G. and Treese, S. M.** (2009b). Maternal corticosterone reduces egg fertility and hatchability and increases the numbers of early dead embryos in eggs laid by quail hens selected for exaggerated adrenocortical stress responsiveness. *Poult. Sci.* **88**, 1352–1357.

**Schultner, J., Kitaysky, A. S., Gabrielsen, G. W., Hatch, S. A. and Bech, C.** (2013). Differential reproductive responses to stress reveal the role of life-history strategies within a species. *Proc. R. Soc. B* **280**, 20132090.

**Shahbazi, M., Jimenez, P., Martinez, L. A. and Carruth, L. L.** (2014). Effects of housing condition and early corticosterone treatment on learned features of song in adult male zebra finches. *Horm. Behav.* **65**, 226–237.

**Spée, M., Marchal, L., Lazin, D., Le Maho, Y., Chastel, O., Beaulieu, M. and Raclot, T.** (2011a). Exogenous corticosterone and nest abandonment: A study in a long-lived bird, the Adélie penguin. *Horm. Behav.* **60**, 362–370.

**Spée, M., Marchal, L., Thierry, A.-M., Chastel, O., Enstipp, M., Le Maho, Y., Beaulieu, M. and Raclot, T.** (2011b). Exogenous corticosterone mimics a late fasting stage in captive Adélie penguins (*Pygoscelis adeliae*). *Am. J. Physiol. Regul. Integr. Comp. Physiol.* **300**, R1241-R1249.

**Stier, K. S., Almasi, B., Gasparini, J., Piault, R., Roulin, A. and Jenni, L.** (2009). Effects of corticosterone on innate and humoral immune functions and oxidative stress in barn owl nestlings. *J. Exp. Biol.* **212**, 2085–2091.

**Tartu, S., Bustamante, P., Angelier, F., Lendvai, Á. Z., Moe, B., Blévin, P., Bech, C., Gabrielsen, G. W., Bustnes, J. O. and Chastel, O.** (2016). Mercury exposure, stress and prolactin secretion in an Arctic seabird: an experimental study. *Funct. Ecol.* **30**, 596–604.

**Thierry, A. M., Massemin, S., Handrich, Y. and Raclot, T.** (2013a). Elevated corticosterone levels and severe weather conditions decrease parental investment of incubating Adélie penguins. *Horm. Behav.* **63**, 475–483.

**Thierry, A.-M., Ropert-Coudert, Y. and Raclot, T.** (2013b). Elevated corticosterone levels decrease reproductive output of chick-rearing Adélie penguins but do not affect chick mass at fledging. *Conserv. Physiol.* **1**, cot007.

**Thierry, A. M., Brajon, S., Spée, M. and Raclot, T.** (2014). Differential effects of increased corticosterone on behavior at the nest and reproductive output of chick-rearing Adélie

penguins. *Behav. Ecol. Sociobiol.* **68**, 721-732.

**Vallarino, A., Wingfield, J. C. and Drummond, H.** (2006). Does extra corticosterone elicit increased begging and submissiveness in subordinate booby (*Sula nebouxii*) chicks? *Gen. Comp. Endocrinol.* **147**, 297–303.
